# Supplementary material
Source: PubMed Central journal article supplement (PMC4351430)
Supplement: ncomms4319-s1.pdf [file ncomms4319-s1.pdf]

**Supplementary Table 1. Sequences of primers used for molecular cloning**

| Gene name, PCR product     | Forward primer                              | Reverse primer                            |
|----------------------------|---------------------------------------------|-------------------------------------------|
| <i>docA</i>                | AACTACCGGTAAAATGGCATCAGTGTCAAGCT            | TACTGCTAGCATTAAATTTTTGTCTTGAATTTTTTCATTGT |
| <i>docB</i>                | AACTGACCGGTAAAATGGCTGATCAACAAGGTAATT        | TACTGCTAGCAATTAATTATGAATTGATTCAATTTCACTTG |
| DDB0232276                 | AACTAGATCTAAAATGGTTTTACAATTTGTGCGACGAT      | TACTACTAGTGGCTTTTACTCTTGAAGAAGTTCC        |
| <i>pakB</i>                | AACTAGATCTAAAATGGAGCAATCAAAAAGAGTTTC        | TACTACTAGTATGAATTGAAAATTTACTATGAGCTTC     |
| <i>kxcB</i>                | AACTAGATCTAAAATGGAATTATCTGAACCAAAACAAAG     | TACTACTAGTTTCAGTCATCATACCAGTGTTTTTTAAC    |
| <i>rapgap1</i>             | AACTAGATCTAAAATGTCAATTTATCATGGTATTATAGGATC  | TACTACTAGTTTCACTACCAAAATCAGTAATGAATG      |
| <i>scar</i>                | ATACTGGATCCAAAATGGTATTAATTACAAGATATTTACCATC | ATACTACTAGTATCCCAATCAGAATCATCAGA          |
| <i>docA</i> – 1361-4205 bp | GAATCCAAATGAAAGAATTAGAACAATCTT              | TACTAAAATGGAAATGTAATAATTGGAAAA            |
| <i>docB</i> – 5245-6755 bp | AAAAGAATTGAAAGTAAAACGATTGAA                 | CCCTTTGAAGTTTTGGGAAA                      |
| RFP-LifeAct cassette       | AAAAGCCGGCTCATTTTATAATCTCAGAAACCTC          | TTTAAGCCGGCAATTTTCATTGGAATTTATTTGGG       |
